# Supplementary material for: Applicability of an Immersive Virtual Reality Exercise Training System for Office Workers during Working Hours
Source: MDPI journal article supplement (doi:10.3390/sports10070104), 2022-06-29

Boxplots

Personal Innovativeness

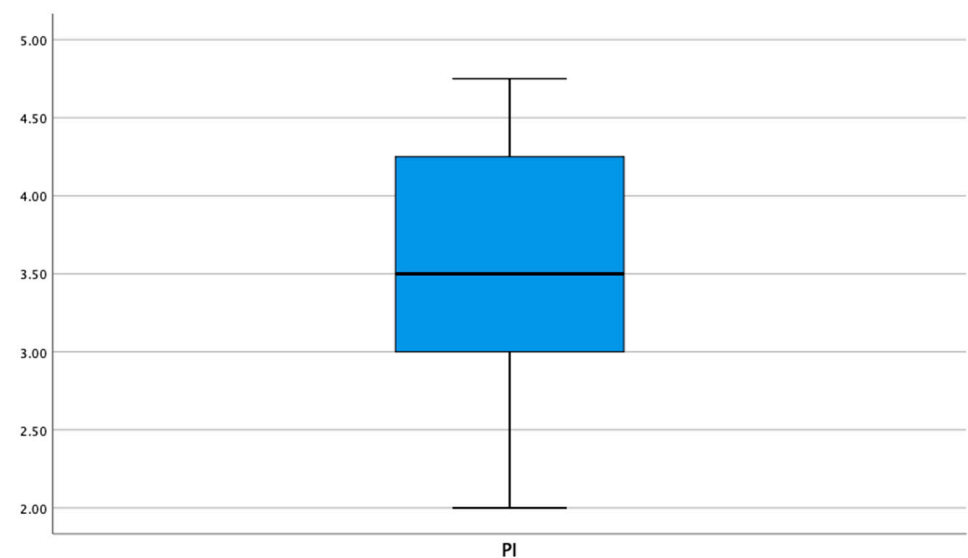

Perceived Enjoyment

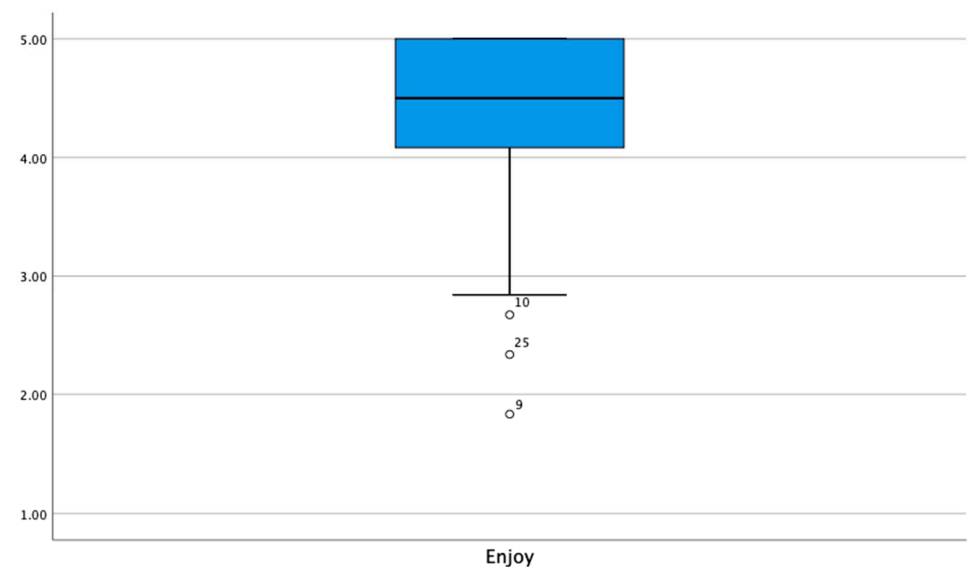

Intention

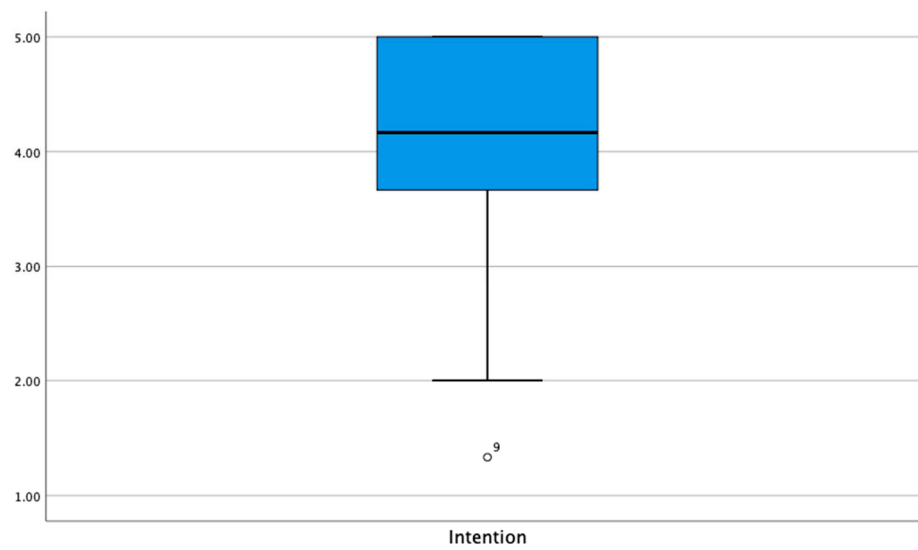

## Usability

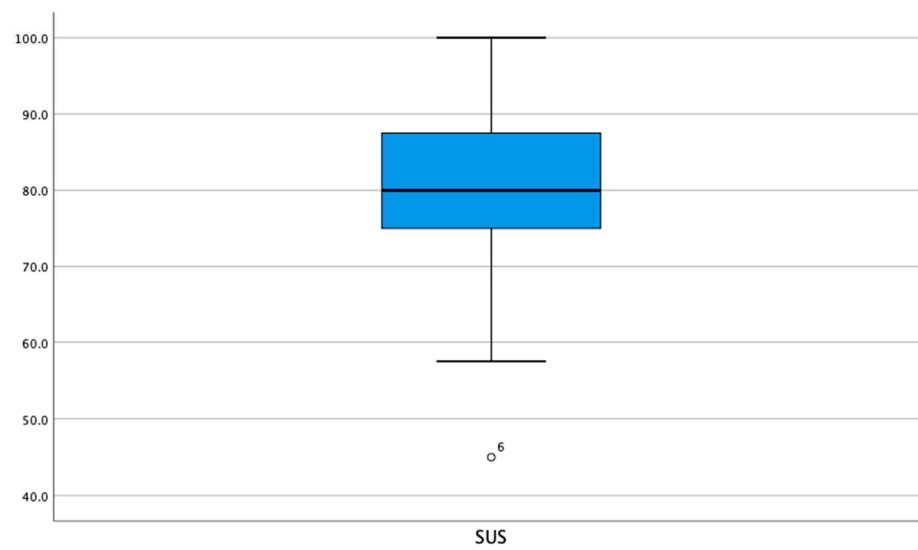

## VR equipment

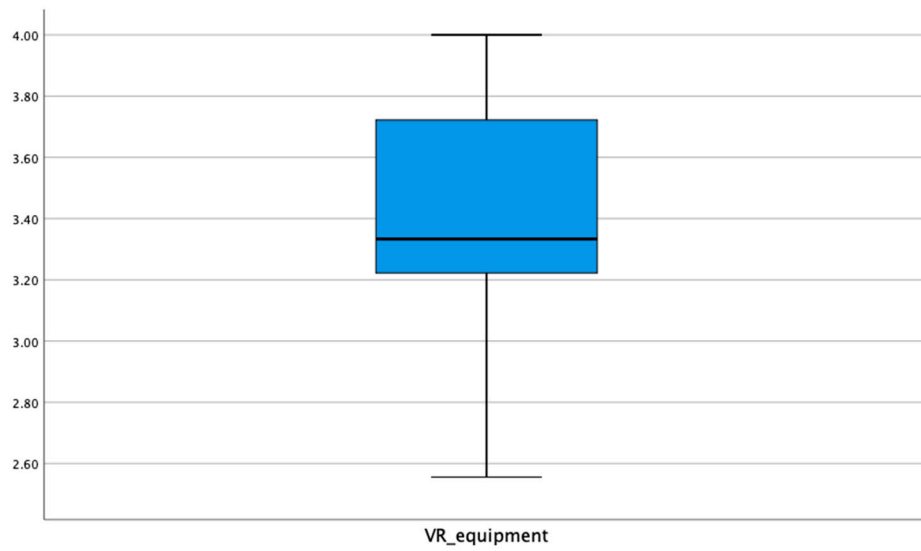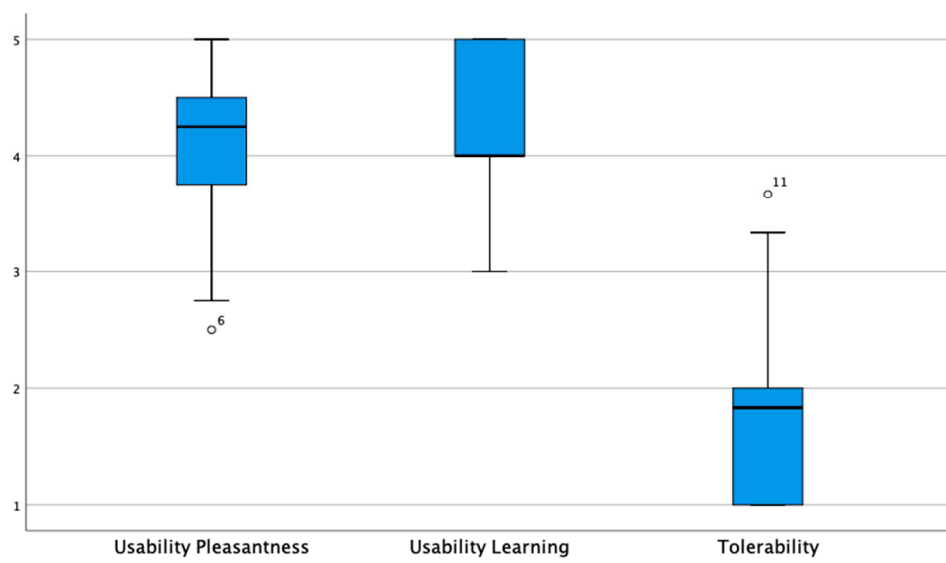

## Attitudes

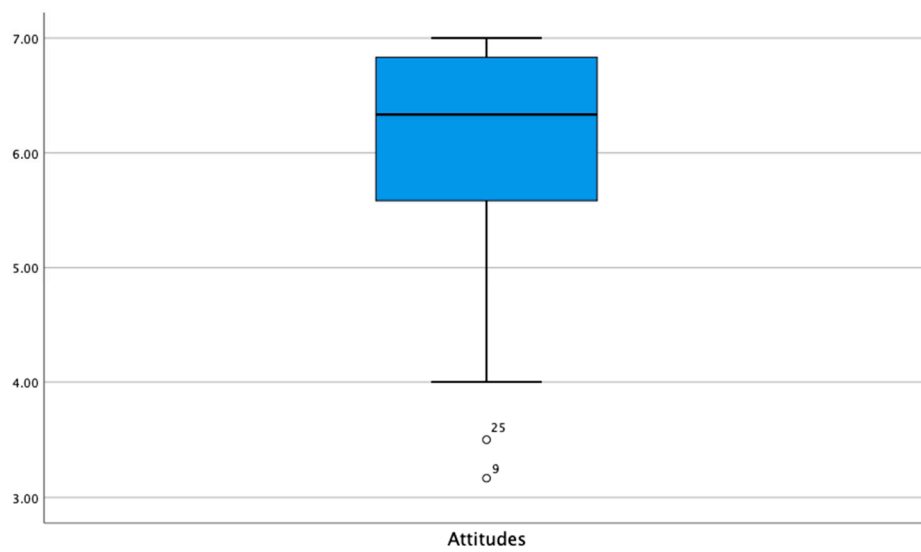

Interest/enjoyment

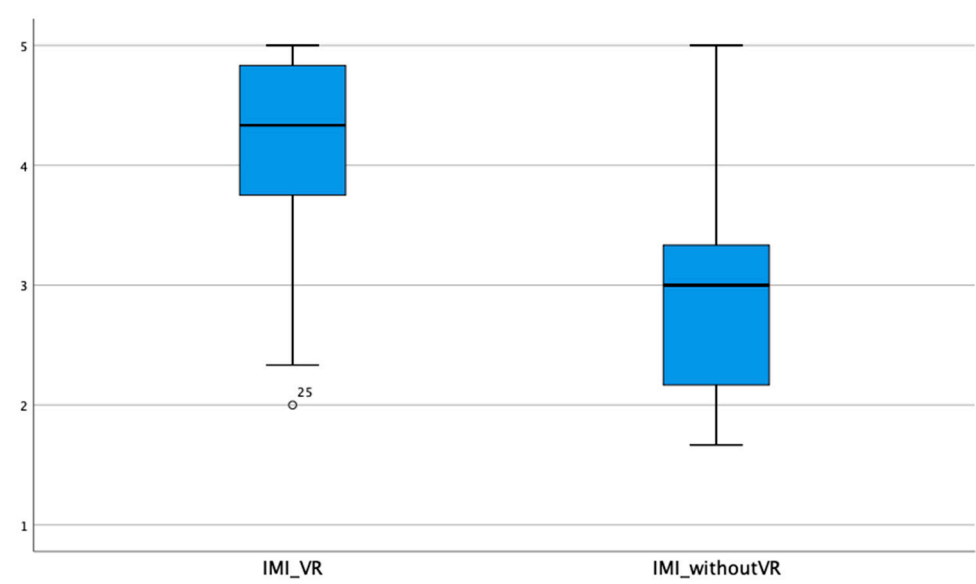

Preference

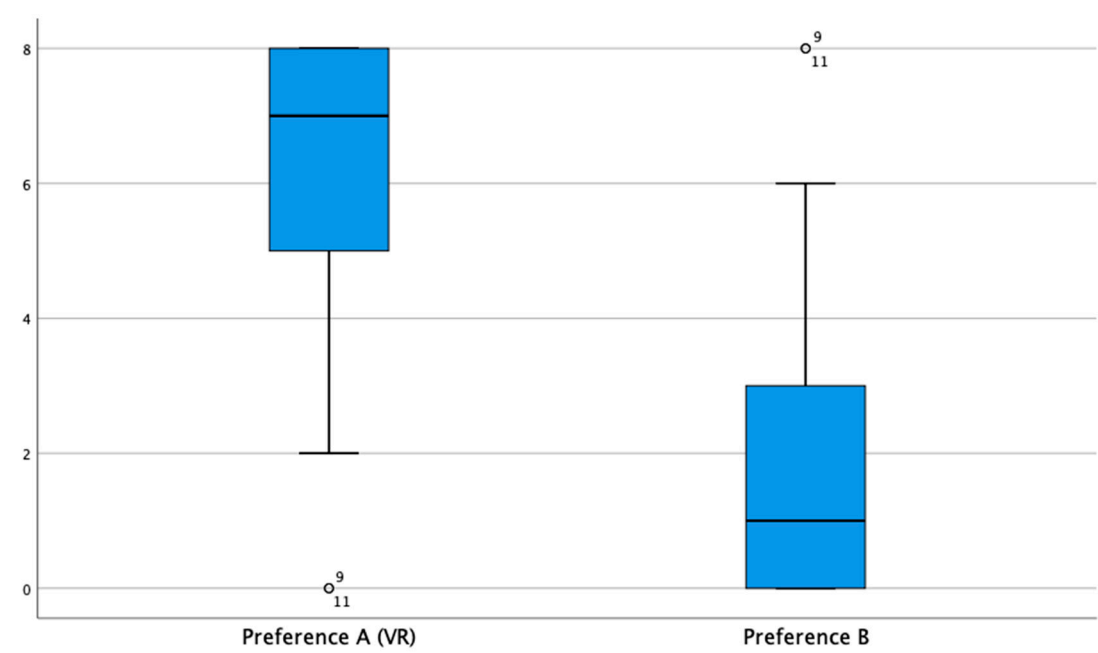

Supplement: s1 [file s1]
